# Supplementary material
Source: HighWire-hosted journal article supplement (https://gh.bmj.com/content/3/1/e000664)
Supplement: inline-supplementary-material-1 [file inline-supplementary-material-1.docx]

**Le financement basé sur la performance dans les pays à revenu faible et intermédiaire :n’est-il pas temps de le repenser?**

***Traduction de l’article: Performance-Based Financing in Low- and Middle-Income Countries: Isn’t it time for a re-think?***

***BMJ Global Health* 2018 vol. 3 no. 1. doi:** [**10.1136/bmjgh-2017-000664**](https://doi.org/10.1136/bmjgh-2017-000664)

Elisabeth Paul,1,2 Lucien Albert,3 Badibanga N’Sambuka Bisala,4 Oriane Bodson,2 Emmanuel Bonnet,5 Paul Bossyns,6 Sandro Colombo,7 Vincent De Brouwere,8 Alexandre Dumont,9 Dieudonné Sèdjro Eclou,10 Karel Gyselinck,6 Fatoumata Hane,11 Bruno Marchal,8 Remo Meloni,12 Mathieu Noirhomme,13 Jean-Pierre Noterman,14 Gorik Ooms,15 Oumar Mallé Samb,16 Freddie Ssengooba,17 Laurence Touré,18 Anne-Marie Turcotte-Tremblay,19 Sara Van Belle,8 Philippe Vinard,20 Valéry Ridde9

**Disclaimer : This web only file has been produced by the BMJ Publishing Group from an electronic file supplied by the authors and has not been edited for content. This material has been translated by Elisabeth Paul and Valéry Ridde. BMJ Publishing Group take no responsibility for the accuracy of the translation from the published English language original and are not liable for any errors that may occur.**

**Clause de non-responsabilité : Ce fichier Web a été produit par le BMJ Publishing Group à partir d’un fichier électronique fourni par les auteurs et n’a pas été édité quant à son contenu. Ce texte a été traduit par Elisabeth Paul et Valéry Ridde. BMJ Publishing Group décline toute responsabilité quant à l’exactitude de la traduction de l’original anglais publié et décline toute responsabilité en cas d’erreurs éventuelles.**

# **Résumé**

Le présent article remet en question l’opinion selon laquelle le financement basé sur les résultats (FBR) dans le secteur de la santé est une approche efficace, efficiente et équitable pour améliorer la performance des systèmes de santé dans les pays à revenu faible et intermédiaire (PRF-PRI). Le FBR a été conçu comme une approche ouverte, adaptée aux besoins spécifiques des pays et susceptible de favoriser les réformes à l’échelle du système. Cependant, comme c’est le cas pour beaucoup de stratégies et d’outils, il y a un écart entre ce qui a été planifié et ce qui est réellement mis en œuvre. Cet article soutient que le FBR, tel qu’il est actuellement mis en œuvre dans de nombreux contextes, ne remplit pas ses promesses. Premièrement, depuis le début de la mise en œuvre du FBR dans les PRF-PRI, des préoccupations ont été soulevées, sur base des preuves empiriques provenant de différents contextes et disciplines, sur les risques, les coûts et les effets pervers. Toutefois, la mise en œuvre du FBR a été précipitée malgré l’insuffisance de preuves de son efficacité. Deuxièmement, il y a un manque d’appropriation nationale du FBR. Compte tenu du temps et de l’argent qu’il absorbe maintenant et du manque de preuves de son efficacité et de son efficience, le FBR peut être qualifié de phénomène de mode de la part des bailleurs de fonds. Troisièmement, en se présentant comme une approche globale qui permet d’aborder tous les aspects du système de santé dans n’importe quel contexte, le FBR monopolise l’attention et concentre le dialogue politique sur les résultats à court terme, tout en détournant l’attention et les ressources des processus de changement plus vastes, plus holistiques et des réformes nécessaires. On accorde trop peu d’attention aux effets systémiques et à long terme, alors que le FBR peut nuire aux services et aux systèmes de santé. Le présent article se termine par la proposition de points d’entrée pour des approches différentes pour la réforme des systèmes de santé.

# **Points clés**

Que sait-on déjà sur le sujet ?

- Les données probantes sur l’efficacité du FBR sont mitigées, et absentes sur son efficience et son équité.
- Des données empiriques provenant de différents milieux et disciplines montrent les risques, les coûts et les effets pervers du FBR.
- Malgré l’insuffisance de données probantes, le FBR est de plus en plus promu par les bailleurs de fonds et mis en œuvre.

Q’apporte cet article ?

- Les consultants et les organismes internationaux jouent de plus en plus un rôle de courtier dans la diffusion du FBR, au détriment de l’initiative et de l’appropriation nationales.
- Sur la base de notre expérience de terrain dans un large éventail de pays, nous avons constaté que la manière dont le FBR est effectivement mis en œuvre s’écarte nettement de l’idéal d’une approche ouverte permettant des réformes des systèmes de santé dans les PRF-PRI.
- Trop peu d’attention est accordée aux effets systémiques et à long terme, de sorte que le FBR peut nuire aux services et aux systèmes de santé.

Comment cet article peut influencer la pratique ?

- Nous plaidons en faveur de l’abandon de la diffusion aveugle du modèle standard de FBR de la manière dont il a été mis en œuvre jusqu’à présent.
- Du temps, de l’attention et des ressources devraient être consacrés au renforcement des composantes clés du système de santé pour leur permettre de mieux fonctionner.

# **Introduction**

Cela fait dix ans qu’a été lancé le *Health Results Innovation Trust Fund* (HRITF), qui vise à promouvoir le financement basé sur les résultats (FBR) dans le secteur de la santé dans les pays à revenu faible et intermédiaire (PRF-PRI), et sept ans qu’est paru l’article intitulé “Performance-based financing: just a donor fad or a catalyst towards comprehensive health-care reform?”(1), dans lequel les auteurs affirment que le FBR peut catalyser des réformes globales et aider à résoudre les problèmes structurels des services de santé, et qu’il peut contribuer à transformer en profondeur le secteur public des pays à faible revenu. Nous pensons qu’il est temps de remettre en question l’opinion générale selon laquelle le FBR est une approche efficace, efficiente et équitable pour améliorer la performance des systèmes de santé.

Le FBR a été conçu par ses promoteurs – presque tous européens ou américains – comme une approche permettant de réformer les systèmes de santé dans des pays où les réformes passées avaient vraisemblablement échoué.(1–3) On peut toutefois se demander si d’autres réformes plus systémiques, telles que des réformes ambitieuses en matière de décentralisation ou de ressources humaines, (i) ont effectivement échoué, (ii) ont reçu un soutien financier suffisant au fil des ans et (iii) ont effectivement fourni un financement adéquat au niveau opérationnel – ce qui pourrait en fait être la question cruciale à résoudre. En effet, par exemple, l’étude du FBR selon une méthode expérimentale au Cameroun a montré que, pour la plupart des résultats positifs, il n’y avait pas de différence statistiquement significative entre les établissements de santé soumis au modèle standard du FBR et un groupe témoin recevant tous les éléments du FBR, à l’exception du lien direct entre la performance de chaque établissement et le financement additionnel fourni par le programme.(4)

Le FBR a été conçu comme une approche ouverte et adaptée aux besoins spécifiques des pays, même dans des contextes fragiles. Il est conçu comme un outil pour aider à créer des services de santé meilleurs, plus inclusifs et plus accessibles(2) et comme une approche de réforme des systèmes, qui offre une réponse au « comment » de la couverture santé universelle et des objectifs de développement durable.(3) En théorie, l’approche a le potentiel de favoriser des réformes à l’échelle du système en ce qui concerne les ressources humaines (motivation accrue), la gestion financière (autonomie des structures de santé, outils de gestion), l’information sur la santé et d’autres aspects de la gouvernance.(1–3) Cependant, comme c’est le cas pour de nombreuses politiques, stratégies, et de nombreux outils, il existe un fossé entre ce qui était planifié et ce qui est réellement mis en œuvre.(5) En fait, nous soutenons que le FBR, tel qu’il est actuellement mis en œuvre dans de nombreux contextes – dans le cadre de l’approche standard, non viable, financée par les bailleurs de fonds et guidée par ceux-ci – ne respecte pas ses promesses et peut même nuire aux services et aux systèmes de santé.

Dans cet article analytique, nous présentons un point de vue critique sur la façon dont le FBR est mis en œuvre. Les co-auteurs de cet article sont des chercheurs, des universitaires et des experts en santé publique d’Europe, d’Amérique du Nord et d’Afrique, qui travaillent avec les gouvernements bénéficiaires, dans des centres de recherche ou des agences de coopération, ou en tant qu’experts individuels. Nous partageons tous une solide connaissance et une solide expérience du terrain et sommes tous préoccupés par ce que nous avons observé lors de la mise en œuvre des programmes de FBR. En effet, le modèle idéal ouvert et propice à la réforme du FBR est souvent mis en œuvre sous la forme d’un schéma directeur rigide ou d’un modèle « voyageur ».(6) La plupart du temps financée par les bailleurs de fonds, la mise en œuvre est souvent dissociée des institutions existantes du système de santé et ne favorise pas des réformes efficaces à l’échelle du système.(7–9) Nous soutenons que la mise en œuvre du FBR a été précipitée en dépit de l’insuffisance des preuves de son efficacité, qu’il y a un manque d’appropriation du FBR, et que trop peu d’attention est accordée à ses effets systémiques et à long terme. Nous concluons en proposant des points d’entrée pour des approches différentes.

# **La mise en œuvre du FBR a été précipitée**

Le FBR, tel qu’il est actuellement promu dans les PRF-PRI par le HRITF et d’autres bailleurs de fonds, a été principalement conçu par des universitaires et des professionnels issus de pays riches, comme une approche novatrice pour améliorer les performances du secteur de la santé, sans faire le point sur l’expérience acquise par des pratiques similaires dans les pays à revenu élevé.(10) Cela soulève des inquiétudes, car le FBR n’est pas particulièrement populaire dans les pays riches. Les preuves de son efficacité sont mitigées et son efficience n’a pas pu être démontrée de manière crédible.(11–17) Il convient de faire preuve d’une prudence particulière lorsqu’il s’agit d’introduire une réforme dans un système aussi complexe que le secteur de la santé(18), et d’agir sur un objet aussi multidimensionnel et changeant que la motivation des acteurs,(19,20) ce qui peut entraîner des conséquences imprévues (ou négatives) à long terme. Les effets pervers sont bien connus dans la littérature économique et de gestion et comprennent la manipulation des données, la sélection adverse, l’étroitesse de vue, la distorsion des efforts, l’éviction de la motivation intrinsèque et du professionnalisme.(19–24)

Depuis le début de la mise en œuvre du FBR dans les PRF-PRI, des préoccupations ont été soulevées, sur la base de données empiriques provenant de différents contextes et disciplines qui indiquaient les risques, les coûts et les effets pervers.(25–27) Présentée comme un produit phare par les promoteurs du FBR, l’histoire à succès du Rwanda a été remise en question très tôt.(28,29) Près d’une décennie plus tard, les preuves sont encore rares et mitigées :

- La question n’a pas encore été tranchée sur le fait qu’il existe des preuves crédibles et reproductibles de l’efficacité du FBR.(30) Une étude Cochrane récente a conclu que les effets des incitants offerts aux prestataires sont incertains, y compris les effets du FBR sur la performance des prestataires, sur l’utilisation des services, sur les résultats pour les patients ou sur l’utilisation des ressources dans les pays à faible revenu.(31)
- Le FBR s’est avéré coûteux. En Tanzanie, le coût économique du FBR était deux fois plus élevé que le coût financier. Dans un contexte de faible revenu, les coûts liés à la gestion du programme ainsi qu’à la production et à la vérification des données de performance étaient substantiels.(32) Dans le cadre du modèle de FBR promu par la Banque mondiale au Bénin, pour chaque US$1 versé aux prestataires, environ US$0,50 était utilisé pour la vérification, dont 39% allaient à l’agence d’exécution et 61% aux organismes communautaires chargées de la contre-vérification communautaire. Ceci comprend uniquement les coûts financiers – par exemple, les transactions financières résultant des activités de vérification introduites par le programme de FBR – et ne comprend pas les coûts économiques, tels que le temps consacré à la vérification par les équipes d’encadrement de zone sanitaire et le personnel de l’agence d’exécution, ni les coûts en capital.(33) Au Burkina Faso, sur la période 2014-2015, les coûts d’exploitation (au sens large) ont représenté 30% du coût total du programme de FBR.(34) Cependant, il n’y a pas de preuve que le FBR soit efficient.(35)
- Au Rwanda, le FBR s’est avéré non équitable.(36)
- Des distorsions et des effets pervers prévus par plusieurs auteurs(10,26,37,38) sont apparus sur le terrain. Il s’agit notamment d’une offre induite excédentaire de services inutiles, de la manipulation des données (y compris par les contrôleurs), du tri sélectif des services achetés par les agences de FBR, de la dissimulation des ruptures de stock de médicaments essentiels, du respect des normes uniquement pendant les supervisions FBR, d’une surcharge de travail, de l’incertitude et d’une pénalisation indue de certains travailleurs de santé, conduisant à l’insatisfaction du personnel de santé.(8,25,29,39–43)
- L’effet supposément motivant du FBR sur les travailleurs de la santé peut être inversé si ces derniers le perçoivent comme injuste ou inéquitable.(44,45)
- Les conséquences de la mauvaise conception des programmes de FBR, ainsi que celles de l’arrêt soudain du programme (comme cela s’est produit au Bénin, au Tchad et au Mali, par exemple), comprennent des effets négatifs à la fois sur la motivation et la prestation de services.(46,47)

En 2014, le Groupe indépendant d’évaluation de la Banque mondiale a lancé un signal d’alarme. Il a constaté que de nombreux projets pilotes de FBR avaient échoué et que des décisions avaient été prises de passer à l’échelle sans tenir compte des résultats faibles, peu concluants ou incomplets des projets pilotes. Il a déclaré que la Banque mondiale avait appuyé le FBR sans preuves suffisantes de son efficacité(48) Malgré tout, les bailleurs ont intensifié leur appui au FBR. Entre 2007 et juin 2016, le HRITF a déboursé 281,7 millions de dollars US, dont 68% au cours des trois dernières années, lorsque la majorité des programmes de FBR financés par le HRITF ont été lancés (<https://www.rbfhealth.org/mission>). Le nombre de bailleurs bilatéraux et multilatéraux qui financent le FBR a augmenté au cours des trois dernières années. En 2017, la Banque mondiale a reconnu que des recherches supplémentaires étaient nécessaires pour évaluer l’efficacité des systèmes basés sur la performance et que leur impact peut dépendre des conditions existantes.(49)

# **Le FBR est une solution portée par les bailleurs de fonds**

L’approche FBR a été mise au point dans des contextes très spécifiques (post-conflit ou États en déliquescence : Cambodge, Haïti, Rwanda, Burundi) par un cercle très étroit de consultants et de chercheurs.(2) De petits projets pilotes, le FBR a été développé à grande échelle pour la première fois dans le contexte atypique du Rwanda. Les premiers résultats rapportés laissaient entendre qu’il s’agissait d’un succès,(50) bien que cette conclusion ait été remise en question plus tard, tant en ce qui concerne sont efficacité (51) que son équité.(36) À parit de là, le FBR a été rapidement et largement diffusé avec l’appui intense des bailleurs de fonds. Le HRITF a jusqu’à présent soutenu 35 programmes de FBR dans 29 pays (<https://www.rbfhealth.org/mission>). En revanche, à l’exception du Burundi et du Rwanda, les pays bénéficiaires consacrent peu de fonds nationaux au FBR.

Le FBR ne s’est développé comme une stratégie locale dans aucun PRF-PRI. Tous les programmes de FBR ont été lancés et élaborés avec l’appui des bailleurs de fonds. Compte tenu de son manque d’appropriation nationale, du temps et de l’argent qu’il absorbe actuellement et du manque de preuves d’efficacité et d’efficience, le FBR peut être qualifié de phénomène de mode provenant des bailleurs de fonds. Bien que certains finissent par s’avérer être des innovations durables, le phénomène de mode type est extrêmement populaire mais de courte durée, abandonné et facilement remplacé par de nouveaux modèles.(52)

Comment expliquer ce phénomène de mode ? L’agenda de la gestion axée sur les résultats est tentant pour les bailleurs,(53) en particulier dans un contexte de récession financière mondiale. De plus, comme on l’a observé lors de la diffusion du New Public Management, une nouvelle « industrie familiale de consultants » a été engendrée par cette stratégie axée sur les résultats.(54) En effet, les consultants et les organismes internationaux jouent de plus en plus un rôle de courtage dans la gouvernance mondiale de la santé, et en particulier dans la diffusion du FBR, au détriment de l’initiative et de l’appropriation nationales.(55) Comme Pavignani et ses collègues l’ont souligné, (56) le FBR a été diffusé dès le départ d’une manière « évangélique ». Actuellement, deux réseaux étroitement liés font la promotion du FBR : SINA Health, qui a organisé 62 cours (<http://www.sina-health.com/>), et la communauté de pratique (CdP) du FBR (<http://www.healthfinancingafrica.org/>). Les concepteurs du FBR ont coopté et formé un nombre croissant de « champions du FBR » qui, à leur tour, ont été envoyés dans les pays voisins pour le diffuser. Si la CdP a été créée pour encourager un débat ouvert, les intérêts personnels et institutionnels sous-jacents ne prêtent guère à controverse.

Comme Barnes et ses collègues l’ont fait remarquer, le blog de la communauté de pratique FBR en santé est révélateur du biais positif attribué aux approches basées sur la performance de la réforme du système de santé. Aucun des 38 billets de blog publiés en juillet 2014 n’était ouvertement critique ou précis au sujet des limites potentielles du FBR. Dans chacune des entrées, les défis étaient contrebalancés par une longue liste des avantages du FBR et, dans certains cas, par les histoires à succès remportées par les pays phares du FBR. Les auteurs poursuivent en pointant qu’un tel biais positif n’est pas surprenant étant donné les sommes que la Banque mondiale a investies dans ces programmes, présentés comme des programmes phares de sa section Santé, nutrition et population. Cependant, l’utilisation de blogueurs favorables au FBR – des ONG partenaires de mise en œuvre comme Cordaid, des consultants de la Banque mondiale et des représentants des ministères de la santé des pays considérés comme une « success story » – et le manque de représentation de certaines des limites ou des autres solutions potentielles que le FBR – ainsi que de ceux qui sont moins convaincus de son pouvoir transformateur – renforcent le biais positif.(55)

L’enthousiasme qui émane de la CdP n’est pas étayé par des preuves solides que le FBR est une approche efficace et efficiente, malgré l’argument circulaire selon lequel son adoption par les PRF-PRI est un indicateur de son succès. De nombreux professionnels semblent simplement suivre l’exemple parce qu’ils perdraient des compléments de salaire ou des opportunités de travail ou de consultation s’ils n’adhéraient pas au FBR. Cela peut être particulièrement le cas pour les chercheurs africains, qui ont moins de possibilités d’obtenir des subventions de recherche et qui ont tendance à compter beaucoup sur les services de consultance.(57) Plus inquiétant encore, c’est également le cas pour les chercheurs en général, les biais de publication et les conflits d’intérêts semblent particulièrement prévalents dans ce domaine.(7,35) Plusieurs coauteurs de cet article ont subi des pressions morales, et même des menaces, pour avoir osé exprimer leurs inquiétudes au sujet des programmes de FBR dans les pays et/ou pour avoir essayé de découvrir ce qui se passait réellement pendant la mise en œuvre des programmes.

En fin de compte, l’argent est sans doute la force qui pousse les pays bénéficiaires à adopter l’agenda du FBR. Mais les bailleurs de fonds utilisent aussi la pression politique et d’autres méthodes (par exemple, des promesses de financement et de voyages d’étude dans les pays « à succès ») pour persuader les pays d’« acheter » le FBR.(9,55,58,59) C’est particulièrement pervers dans les contextes de détresse : comme on l’a observé en Haïti par exemple, « le manque de preuves positives ne suffit pas pour qu’un Ministère de la Santé impuissant rejette une approche fortement défendue et généreusement financée » *(notre traduction)*.(60)

# **Le FBR peut en fait affaiblir les systèmes de santé PBF**

Sur la base de notre expérience sur le terrain dans un large éventail de pays, dont le Bénin, le Burkina Faso, le Cameroun, la République démocratique du Congo (RDC), Haïti, le Mali, le Niger, le Nigéria, l’Ouganda, le Rwanda, le Sénégal et le Zimbabwe, nous avons constaté que la mise en œuvre effective du FBR sous la pression des bailleurs s’écarte nettement de l’idéal d’une approche ouverte permettant des réformes du système dans les PRF-PRI. Il semble que de nombreux pays adoptent le FBR parce que les bailleurs ont convaincu les « champions du FBR » de l’acheter. Certains champions le font parce qu’ils voient des avantages directs et personnels dans la gestion de sa machinerie. Au Bénin, par exemple, l’acronyme FBR est populairement connu sous le nom de « financements bien ramassés ». Les bénéficiaires ne sont pas informés et ne comprennent pas tout à fait comment et pourquoi ils reçoivent certaines primes du FBR.(42,61) Par conséquent, dans de nombreux pays, l’appropriation du FBR est limitée à un cercle très restreint.(62) Cela signifie, par exemple, que les ministères chargés des finances et de la fonction publique ne sont pas réellement impliqués dans sa conception et son évaluation, et qu’ils ne sont donc pas en mesure de promouvoir les réformes globales nécessaires, telles que l’autonomie financière accrue des districts et des établissements de santé, qui est censée être une composante essentielle du « package ».(63) Le FBR n’est donc pas intégré dans les processus de routine des systèmes de santé, mais fait plutôt l’objet de missions d’évaluation, de budgets et d’outils de collecte de données distincts.(8,9,42)

En se présentant comme une approche globale qui permet d’aborder tous les aspects du système de santé dans n’importe quel contexte, le FBR monopolise l’attention et concentre le dialogue politique sur les résultats à court terme des programmes de FBR, tout en détournant l’attention et les ressources des processus de changement plus larges et des réformes nécessaires.(53) Ces dernières comprennent un large éventail d’améliorations possibles : aux conditions de travail ; à la gestion des ressources humaines (disparités dans la répartition du personnel de santé ; qualité de la formation initiale et continue ; bas salaires et faible redevabilité ; pléthore de personnels de santé non formés, comme dans le cas de la RDC) ;(64) à la transparence dans l’utilisation des ressources financières ; à la qualité des soins ; à l’intégration des programmes et de leur suivi et évaluation ;(65) à la redevabilité ; à la gestion des finances publiques ; à la participation des communautés (par exemple, à travers les comités de santé villageois, les chefs traditionnels et les autres membres des communautés) dans la gestion de la demande et de l’offre de services de santé;(66) etc. Paradoxalement, tous ces facteurs sont des déterminants structurels de la réussite du FBR.(9,44,66)

Au total, le FBR a un coût d’opportunité énorme : des millions de dollars ont été dépensés pour des mécanismes complexes de gestion et de vérification qui ne sont pas à l’épreuve de la fraude, sans produire des résultats positifs soutenus (même si certains ont été observés) ou renforcer les systèmes de santé de façon durable.

# **Quelles sont les autres possibilités ?**

Outre les évaluations individuelles d’impact dans les pays (voir <https://www.rbfhealth.org/impact>), le HRITF lui-même est en cours d’évaluation, et il devrait prendre fin en 2022. L’organisation reconnaît que, compte tenu des nouveaux éléments de preuves issus des évaluations d’impact et de la forte expérience sur le terrain, c’est un bon moment pour ré-imaginer le FBR et se préparer pour l’avenir (<https://www.rbfhealth.org/mission-history>). Sur base de notre expérience de terrain et des preuves scientifiques dont nous disposons, nous plaidons en faveur de l’abandon de la diffusion aveugle du modèle standard de FBR de la manière dont il a été mis en œuvre jusqu’à présent, qui ne tient pas compte de la complexité et de la pérennité des systèmes de santé. Il faudrait plutôt consacrer du temps, de l’attention et des ressources au renforcement des principales composantes du système de santé pour leur permettre de bien fonctionner. Pour paraphraser Stephen Kidd au sujet d’une autre stratégie de la Banque mondiale qui « nuit à bon nombre des personnes les plus vulnérables de la planète » *(notre traduction) :*(67) N’est-il pas temps de le repenser? Nous exhortons donc :

- *Les pays récipiendaires :* (1) à ne pas croire aveuglément que le FBR – quel que soit le nouveau label qu’on puisse lui donner à l’avenir – peut résoudre les problèmes causés par les faiblesses de leurs systèmes de santé (voir Naudet pour une perspective historique à ce sujet);(68) (2) à oser parler des problèmes qu’ils rencontrent dans la façon dont le FBR est mis en œuvre et obliger les bailleurs à rendre des comptes vis-à-vis de leurs erreurs ; et (3) à s’assurer d’abord que les fondements soient justes (voir ci-dessous) avant de s’engager dans des mécanismes plus élaborés.
- *Les bailleurs de fonds bilateraux et multilateraux* qui ne se sont pas encore engagés dans l’approche FBR : (1) à ne pas suivre aveuglément l’exemple de la Banque mondiale et des bailleurs de fonds aux vues similaires dans la diffusion du FBR, et (2) à se rappeler que « le véritable moteur du changement viendra des parties prenantes nationales telles que les travailleurs de la santé et les groupes communautaires exigeant le droit à la santé et faisant pression sur les gouvernements pour qu’ils trouvent les mécanismes nécessaires à la réalisation de cet objectif » *(notre traduction)*.(69)
- *Les pays récipiendaires et les bailleurs de fonds :* à accorder une plus grande attention aux approches fondamentales, systémiques, soutenables et propres à chaque pays pour résoudre les problèmes du système de santé, telles que : l’amélioration des conditions de travail (infrastructures et équipements fonctionnels, etc.) ; les réformes salariales (amélioration des salaires à un niveau décent, aligné sur le poste occupé) et des stratégies équilibrées de récompenses et de sanctions ;(70) la gestion des ressources humaines pour renforcer l’estime de soi du personnel de santé ; les primes financières et le respect du travail dans les zones reculées ;(71) le renforcement des espaces de dialogue avec les communautés et l’appui à leurs initiatives;(9) l’utilisation de l’information sur les performances pour la prise de décisions au niveau local ;(72) l’intégration et le renforcement des institutions de suivi et d’évaluation et des mécanismes de redevabilité (locaux) connexes ;(65) l’appui à l’autonomisation du côté de la demande ;(9) la réduction des barrières financières et non financières à l’accès aux soins de santé ;(73) l’élaboration de dossiers médicaux intégrés ; et les réformes financières visant à réduire la fragmentation du financement des prestataires de services de santé, à intégrer leurs processus de budgétisation, de gestion de la trésorerie et d’établissement de rapports financiers, à assurer une allocation équitable des ressources et à fournir des ressources suffisantes et suffisamment flexibles au niveau opérationnel.
- *Les chercheurs indépendants* (puisque les programmes de FBR ne s’arrêteront probablement pas du jour au lendemain) : (1) à continuer à étudier ce qui se passe sur le terrain, tout en minimisant le risque de produire des résultats biaisés ; (74) et (2) à se concentrer en particulier sur la façon dont les parties prenantes transforment le modèle dans la pratique, comment le FBR modifie leurs comportements et sur les effets complexes à long terme du FBR sur la motivation, y compris les effets de son interruption à la suite du retrait des bailleurs de fonds.

# **Contributions**

EP et VR ont eu l’idée initiale d’écrire cet article. Ils en ont écrit la première ébauche et tous les auteurs ont contribué au développement des idées, à la rédaction du manuscrit, aux commentaires sur les ébauches successives, et ont approuvé la version finale.

# **Déclaration de conflit d’intérêts**

Certains auteurs ont été impliqués dans des programmes de FBR en tant que chercheur et/ou consultant et/ou employé d’une agence de coopération.

Les auteurs ont signé cet article en leur nom propre, et leur signature n’implique pas leur organisation respective.

# **Remerciements**

Nous remercions Donna Riley pour son aide éditoriale, ainsi que des collègues anonymes qui ont contribué à cet article, mais qui n’ont pas été en mesure de le signer pour des raisons privées ou institutionnelles. EP et OB sont financées en partie par la subvention ARC pour des Actions de Recherche Concertées, financée par la Communauté française de Belgique (Fédération Wallonie-Bruxelles). Les opinions exprimées sont celles des auteurs, et pas nécessairement celles de leurs institutions respectives.

# **Affiliations des auteurs**

1 Tax Institute, Université de Liège, Liège, Belgique

2 Faculty of Social Sciences, Université de Liège, Liège, Belgique

3 Unité de santé internationale, Université de Montréal, Montréal, Québec, Canada

4 Expert en systèmes de santé de district fondés sur les soins de santé primaires, Groupe d’Appui à la Recherche et Enseignement en Santé Publique, Mbuji-Mayi, République démocratique du Congo

5 Résiliences, Institut de Recherche pour le Dévelopment (IRD), Bondy, France

6 Unité thématique sectorielle santé, Agence belge de développement (ENABEL), Bruxelles, Belgique

7 Consultant indépendant, Madrid, Espagne

8 Département de santé publique, Institut de médecine tropicale, Anvers, Belgique

9 CEPED, Institut de Recherche pour le Dévelopment (IRD), Université Paris Descartes, INSERM, Paris, France

10 LADYD, Université d’Abomey-Calavi, Abomey-Calavi, Bénin

11 Département de Sociologie, Université Assane Seck, Ziguinchor, Sénégal

12 Consultant indépendant, Kigali, Rwanda

13 Consultant indépendant, Bruxelles, Belgique

14 Consultant indépendant, Bunia, République démocratique du Congo

15 Département de santé mondiale et développement, London School of Hygiene and Tropical Medicine, Londres, Royaume-Uni

16 Santé mondiale, Département des sciences de la santé, Université du Québec en Abitibi-Témiscamingue, Québec, Canada

17 Department of Health Policy, Planning and Management, Makerere University School of Public Health, Kampala, Ouganda

18 Anthropologue, Association de reecherche Miseli, Bamako, Mali

19 Institut de recherche en santé publique de l’Université de Montréal, Montréal, Québec, Canada

20 Alter Santé Internationale, Montpellier, France

# **Références**

1. Meessen B, Soucat A, Sekabaraga C. Performance-based financing: just a donor fad or a catalyst towards comprehensive health-care reform? Bull World Health Organ. 2011 Feb 1;89(2):153–6.

2. Fritsche, Gyuri B, Soeters R, Meessen B. Performance-Based Financing Toolkit [Internet]. The World Bank; 2014 [cited 2017 Nov 7]. Available from: http://documents.worldbank.org/curated/en/369941468325159289/pdf/854120PUB0978100Box382147B00PUBLIC0.pdf

3. Soeters R. Performance-based financing in Action – Theory and Instruments – SINA-Health Course Guide with 17 modules. Eighth edition [Internet]. SINA-Health; 2017 [cited 2017 Nov 7]. Available from: http://www.sina-health.com/wp-content/uploads/PBFCourseBookSINATheoryActionEngVF100817.pdf

4. de Walque D, Robyn PJ, Saidou H, Sorgho G, Steenland M. Looking into the Performance-Based Financing Black Box: Evidence from an Impact Evaluation in the Health Sector in Cameroon [Internet]. Policy Research Working Paper 8162. Washington, DC: The World Bank; 2017. Available from: https://doi.org/10.1596/1813-9450-8162

5. Pressman J, Wildavsky A. Implementation. How great expectations in Washington are dashed in Oakland (3rd Ed.). University of California Press. Berkeley, Los Angeles, London; 1984.

6. Olivier de Sardan J-P, Diarra A, Moha M. Travelling models and the challenge of pragmatic contexts and practical norms: the case of maternal health. Health Res Policy Syst. 2017 Jul 12;15(Suppl 1):60.

7. Ssengooba F, McPake B, Palmer N. Why performance-based contracting failed in Uganda--an ‘open-box’ evaluation of a complex health system intervention. Soc Sci Med 1982. 2012 Jul;75(2):377–83.

8. Paul E, Sossouhounto N, Eclou DS. Local Stakeholders’ Perceptions about the Introduction of Performance-Based Financing in Benin: A Case Study in Two Health Districts. Int J Health Policy Manag. 2014;3(4):207–14.

9. Paul E, Dramé ML, Kashala J-P, Ekambi Ndema A, Kounnou M, Aïssan JC, et al. Performance-Based Financing to Strengthen the Health System in Benin: challenging the mainstream approach. Int J Health Policy Manag. 2018;7(1):35–47.

10. Paul E, Renmans D. Performance-based financing in the heath sector in low- and middle-income countries: Is there anything whereof it may be said, see, this is new? Int J Health Plann Manage. 2017 Apr 6;

11. Van Herck P, De Smedt D, Annemans L, Remmen R, Rosenthal MB, Sermeus W. Systematic review: Effects, design choices, and context of pay-for-performance in health care. BMC Health Serv Res. 2010 Aug 23;10:247.

12. Emmert M, Eijkenaar F, Kemter H, Esslinger AS, Schoffski O. Economic evaluation of pay-for-performance in health care: a systematic review. Eur J Health Econ HEPAC Health Econ Prev Care. 2012 Dec;13(6):755–67.

13. Eijkenaar F, Emmert M, Scheppach M, Schoffski O. Effects of pay for performance in health care: a systematic review of systematic reviews. Health Policy Amst Neth. 2013 May;110(2–3):115–30.

14. Ryan AM, Krinsky S, Kontopantelis E, Doran T. Long-term evidence for the effect of pay-for-performance in primary care on mortality in the UK: a population study. Lancet Lond Engl. 2016 Jul 16;388(10041):268–74.

15. Doran T, Maurer KA, Ryan AM. Impact of Provider Incentives on Quality and Value of Health Care. Annu Rev Public Health. 2017 Mar 20;38:449–65.

16. Forbes LJ, Marchand C, Doran T, Peckham S. The role of the Quality and Outcomes Framework in the care of long-term conditions: a systematic review. Br J Gen Pract J R Coll Gen Pract. 2017 Nov;67(664):e775–84.

17. Mendelson A, Kondo K, Damberg C, Low A, Motuapuaka M, Freeman M, et al. The Effects of Pay-for-Performance Programs on Health, Health Care Use, and Processes of Care: A Systematic Review. Ann Intern Med. 2017 Mar 7;166(5):341–53.

18. de Savigny D, Adam T. Thinking for Health Systems Strengthening [Internet]. Alliance for Health Policy and Systems Research and World Health Organization; 2009. Available from: http://www.who.int/alliance-hpsr/resources/9789241563895/en/

19. Adams O, Hicks V. Pay and non-pay incentives, performance and motivation. Prepared for WHO’s December 2000 Global Health Workforce Strategy Group. [Internet]. World Health Organization; 2000 [cited 2017 Nov 9]. Available from: http://www.who.int/hrh/en/HRDJ_4_3_02.pdf

20. Paul E, Robinson M. Performance Budgeting, Motivation and Incentives. In: Performance Budgeting: Linking Funding and Results. International Monetary Fund & Palgrave/McMillan. Basingstoke: Robinson, Marc; 2007. p. 330–75.

21. Frey BF, Jegen R. Motivation Crowding Theory. J Econ Surv. 2001;15:589–611.

22. Shen Y. Selection incentives in a performance-based contracting system. Health Serv Res. 2003 Apr;38(2):535–52.

23. Petersen LA, Woodard LD, Urech T, Daw C, Sookanan S. Does pay-for-performance improve the quality of health care? Ann Intern Med. 2006 Aug 15;145(4):265–72.

24. Sanderson AA. Pay-for-Performance Programs in the United Kingdom. N Engl J Med. 2006 Oct 26;355(17):1832–3.

25. Oxman AD, Fretheim A. Can paying for results help to achieve the Millennium Development Goals? A critical review of selected evaluations of results-based financing. J Evid-Based Med. 2009 Aug;2(3):184–95.

26. Ireland M, Paul E, Dujardin B. Can performance-based financing be used to reform health systems in developing countries? Bull World Health Organ. 2011 Sep 1;89(9):695–8.

27. Witter S, Fretheim A, Kessy FL, Lindahl AK. Paying for performance to improve the delivery of health interventions in low- and middle-income countries . Cochrane Database Syst Rev. 2012 Feb 15;(2):CD007899.

28. Rusa L, Ngirabega J de D, Janssen W, Van Bastelaere S, Porignon D, Vandenbulcke W. Performance-based financing for better quality of services in Rwandan health centres: 3-year experience. Trop Med Int Health TM IH. 2009 Jul;14(7):830–7.

29. Kalk A, Paul FA, Grabosch E. ‘Paying for performance’ in Rwanda: does it pay off? Trop Med Int Health TM IH. 2010 Feb;15(2):182–90.

30. Das A, Gopalan SS, Chandramohan D. Effect of pay for performance to improve quality of maternal and child care in low- and middle-income countries: a systematic review. BMC Public Health. 2016 Apr 14;16:321.

31. Wiysonge CS, Paulsen E, Lewin S, Ciapponi A, Herrera CA, Opiyo N, et al. Financial arrangements for health systems in low-income countries: an overview of systematic reviews. Cochrane Database Syst Rev. 2017 Sep 11;9:CD011084.

32. Borghi J, Little R, Binyaruka P, Patouillard E, Kuwawenaruwa A. In Tanzania, the many costs of pay-for-performance leave open to debate whether the strategy is cost-effective. Health Aff Proj Hope. 2015 Mar;34(3):406–14.

33. Antony M, Bertone MP, Barthes O. Exploring implementation practices in results-based financing: the case of the verification in Benin. BMC Health Serv Res. 2017 Mar 14;17(1):204.

34. Nonkani G, Bakyono R, Tapsoba B. Results-Based Financing (RBF) in the Health Sector in Burkina Faso: Implementation and Expenditure Patterns (January 2014 to December 2015). 2016.

35. Turcotte-Tremblay A-M, Spagnolo J, De Allegri M, Ridde V. Does performance-based financing increase value for money in low- and middle- income countries? A systematic review. Health Econ Rev. 2016 Dec;6(1):30.

36. Lannes L, Meessen B, Soucat A, Basinga P. Can performance-based financing help reaching the poor with maternal and child health services? The experience of rural Rwanda. Int J Health Plann Manage. 2016 Jul;31(3):309–48.

37. Kalk A. The costs of performance-based financing. Bull World Health Organ. 2011 May 1;89(5):319.

38. Miller G, Babiarz KS. Pay-for-Performance Incentives in Low- and Middle-Income Country Health Programs. NBER Working Paper No. 18932 [Internet]. National Bureau of Economic Research; 2013 [cited 2017 Nov 9]. Available from: http://www.nber.org/papers/w18932.pdf

39. Mansourian H, Ousley J. Final Review – Report Result-Based Financing Pilot Project – District of Haut Katanga, Democratic Republic of Congo. International Rescue Committee; 2011.

40. Baird IG, Hammer P. Contracting Illness: Reassessing International Donor-Initiated Health Service Experiments in Cambodia’s Indigenous Periphery. South East Asia Res. 2013 Sep 1;21(3):457–73.

41. Chimhutu V, Lindkvist I, Lange S. When incentives work too well: locally implemented pay for performance (P4P) and adverse sanctions towards home birth in Tanzania - a qualitative study. BMC Health Serv Res. 2014 Jan 18;14(1):23.

42. Ridde V, Yaogo M, Zongo S, Some P-A, Turcotte-Tremblay A-M. Twelve months of implementation of health care performance-based financing in Burkina Faso: A qualitative multiple case study. Int J Health Plann Manage. 2017 Jul 3;

43. Feldacker C, Bochner AF, Herman-Roloff A, Holec M, Murenje V, Stepaniak A, et al. Is it all about the money? A qualitative exploration of the effects of performance-based financial incentives on Zimbabwe’s voluntary male medical circumcision program. PloS One. 2017;12(3):e0174047.

44. Mansourian H. Health Workers’ Perspectives on the Influences of Results Based Financing Model on Health Worker Motivation and Performance in Katanga, D.R. Congo. Doctoral Project. Columbia University, Mailman School of Public Health; 2013.

45. Chimhutu V, Songstad NG, Tjomsland M, Mrisho M, Moland KM. The inescapable question of fairness in Pay-for-performance bonus distribution: a qualitative study of health workers’ experiences in Tanzania. Glob Health. 2016 Nov 25;12(1):77.

46. Kandpal E. Completed Impact Evaluations and Emerging Lessons from the Health Results Innovation Trust Fund Learning Portfolio [Internet]. World Bank; 2017 [cited 2017 Nov 9]. Available from: https://www.rbfhealth.org/sites/rbf/files/IE%20and%20emerging%20lessons_Eeshani%20Kandpal.pdf

47. Alonge O, Lin S, Igusa T, Peters DH. Improving health systems performance in low- and middle-income countries: a system dynamics model of the pay-for-performance initiative in Afghanistan. Health Policy Plan. 2017 Dec 1;32(10):1417–26.

48. Independent Evaluation Group (IEG). World Bank Group Support to Health Financing [Internet]. 2014 [cited 2017 Nov 7]. Available from: http://ieg.worldbankgroup.org/sites/default/files/Data/reports/chapters/health_finance_evaluation_w_appendix_updated_0.pdf

49. World Bank. World Development Report 2017: Governance and the Law [Internet]. World Bank; [cited 2017 Nov 10]. Available from: http://www.worldbank.org/en/publication/wdr2017

50. Basinga P, Gertler PJ, Binagwaho A, Soucat A, Sturdy J, Vermeersch CMJ. Effect on maternal and child health services in Rwanda of payment to primary health-care providers for performance: an impact evaluation. The Lancet [Internet]. 2011;377. Available from: https://doi.org/10.1016/S0140-6736(11)60177-3

51. Skiles MP, Curtis SL, Basinga P, Angeles G, Thirumurthy H. The effect of performance-based financing on illness, care-seeking and treatment among children: an impact evaluation in Rwanda. BMC Health Serv Res. 2015 Sep 14;15:375.

52. Best J. Flavor of the Month: Why Smart People Fall for Fads. University of California Press. Berkeley; 2006.

53. Valters C, Whitty B. The politics of the results agenda in DFID 1997-2017 [Internet]. Overseas Development Institute (ODI) Report; 2017 [cited 2017 Nov 7]. Available from: https://www.odi.org/sites/odi.org.uk/files/resource-documents/11730.pdf

54. Morgan D, Robinson KS, Strachota D, Hough JA. Budgeting for Local Governments and Communities. Routledge. Milton Park; 2014.

55. Barnes A, Brown GW, Harman S. Global Politics of Health Reform in Africa. Palgrave Macmillan. Basingstoke; 2015.

56. Pavignani E, Michael M, Murru M, Beesley ME, Hill PS. Making sense of apparent chaos: health-care provision in six country case studies. Int Rev Red Cross. 2013;395(889):41–60.

57. Olivier de Sardan J-P. Promouvoir la recherche face à la consultance. Autour de l’expérience du lasdel (Niger-Bénin). Cah D’études Afr. 2011;202–203:511–28.

58. Barnes A, Brown GW, Harman S, Papamichail A, Banda P, Hayes R, et al. African participation and partnership in performance-based financing: A case study in global health policy. EQUINET Discussion Paper 102; 2014.

59. Chimhutu V, Tjomsland M, Songstad NG, Mrisho M, Moland KM. Introducing payment for performance in the health sector of Tanzania- the policy process. Glob Health. 2015 Sep 2;11:38.

60. Pavignani E, Colombo S. Strategizing in distressed health contexts. In: Strategizing national health in the 21st century: a handbook. World Health Organization (WHO). Schmets G, Rajan D, Kadandale S; 2016.

61. Renmans D, Holvoet N, Criel B. Combining Theory-Driven Evaluation and Causal Loop Diagramming for Opening the ‘Black Box’ of an Intervention in the Health Sector: A Case of Performance-Based Financing in Western Uganda. Int J Environ Res Public Health. 2017 Sep 3;14(9).

62. Gautier L, Ridde V. Health financing policies in Sub-Saharan Africa: government ownership or donors’ influence? A scoping review of policymaking processes. Glob Health Res Policy. 2017 Aug 8;2(1):23.

63. Renmans D, Holvoet N, Orach CG, Criel B. Opening the ‘black box’ of performance-based financing in low- and lower middle-income countries: a review of the literature. Health Policy Plan. 2016 Nov;31(9):1297–309.

64. Fox S, Witter S, Wylde E, Mafuta E, Lievens T. Paying health workers for performance in a fragmented, fragile state: reflections from Katanga Province, Democratic Republic of Congo. Health Policy Plan [Internet]. 2014;29. Available from: https://doi.org/10.1093/heapol/czs138

65. World Health Organization. Monitoring, evaluation and review of national health strategies: a country-led platform for information and accountability. World Health Organization (WHO) with the International Health Partnership and related initiatives (IHP+);

66. Mabuchi S, Sesan T, Bennett SC. Pathways to high and low performance: factors differentiating primary care facilities under performance-based financing in Nigeria. Health Policy Plan. 2017 Oct 25;czx146-czx146.

67. Kidd S. Anti-Social Registries: How have they become so popular? [Internet]. PATHWAYS’ PERSPECTIVES on social policy in international development Issue No 24; 2017 [cited 2017 Nov 7]. Available from: http://www.developmentpathways.co.uk/resources/wp-content/uploads/2017/09/Anti-Social-Registries-FINAL.pdf

68. Naudet J-D. Trouver des problèmes aux solutions – Vingt ans d’aide au Sahel. Organisation de Coopération et de Développement économiques. Paris; 1999.

69. Tichenor M, Sridhar D. Universal health coverage, health systems strengthening, and the World Bank. BMJ. 2017 Aug 31;358:j3347.

70. Zinnen V, Paul E, Mwisongo A, Nyato D, Robert A. Motivation of human resources for health: a case study at rural district level in Tanzania. Int J Health Plann Manage. 2012 Dec;27(4):327–47.

71. Belaid L, Dagenais C, Moha M, Ridde V. Understanding the factors affecting the attraction and retention of health professionals in rural and remote areas: a mixed-method study in Niger. Hum Resour Health. 2017 Sep 4;15(1):60.

72. Levesque J-F, Sutherland K. What role does performance information play in securing improvement in healthcare? a conceptual framework for levers of change. BMJ Open. 2017 Aug 28;7(8):e014825.

73. O’Connell TS, Bedford KJA, Thiede M, McIntyre D. Synthesizing qualitative and quantitative evidence on non-financial access barriers: implications for assessment at the district level. Int J Equity Health. 2015 Jun 9;14:54.

74. Fretheim A, Witter S, Lindahl AK, Olsen IT. Performance-based financing in low- and middle-income countries: still more questions than answers. Bull World Health Organ. 2012 Aug 1;90(8):559–559A.
